# Supplementary material for: Low Concentration of Antibiotics Modulates Gut Microbiota at Different Levels in Pre-Weaning Dairy Calves
Source: PubMed Central journal article supplement (PMC6313529; doi:10.3390/microorganisms6040118), 2018-11-27
Supplement: microorganisms-06-00118-s001.pdf [file microorganisms-06-00118-s001.pdf]

## Supplementary Materials

**Table S1:** The median concentration of Penicillin, streptomycin, tetracycline and ceftiofur residues in waste milk.

|                                      | Penicillin        | Streptomycin      | Tetracycline    | Ceftiofur       |
|--------------------------------------|-------------------|-------------------|-----------------|-----------------|
| Mean $\pm$ standard deviation (mg/L) | 0.024 $\pm$ 0.034 | 0.019 $\pm$ 0.008 | 0.08 $\pm$ 0.05 | 0.76 $\pm$ 0.43 |
| Median (mg/L)                        | 0.024             | 0.025             | 0.10            | 0.33            |

**Table S2:** Description of the relative abundance of the predominant phyla and genera of the ileum, colon and rectum samples.

| Ileum-Phylum   | Genus                                        | CON                            | LCA                           | LSA                            | P value |
|----------------|----------------------------------------------|--------------------------------|-------------------------------|--------------------------------|---------|
| Firmicutes     |                                              | 0.709 $\pm$ 0.08               | 0.620 $\pm$ 0.18              | 0.590 $\pm$ 0.23               | 0.63    |
|                | <i>Acetitomaculum</i>                        | 0.016 $\pm$ 0.02               | 0.146 $\pm$ 0.14              | 0.023 $\pm$ 0.02               | 0.10    |
|                | <i>Romboutsia</i>                            | 0.093 $\pm$ 0.08               | 0.013 $\pm$ 0.02              | 0.157 $\pm$ 0.30               | 0.54    |
|                | <i>Bacillus</i>                              | 0.026 $\pm$ 0.01               | 0.047 $\pm$ 0.03              | 0.016 $\pm$ 0.01               | 0.15    |
|                | <i>Streptococcus</i>                         | 0.014 $\pm$ 0.01               | 0.004 $\pm$ 0.00              | 0.009 $\pm$ 0.01               | 0.34    |
|                | <i>Faecalibacterium</i>                      | 0.001 $\pm$ 0.00               | 0.029 $\pm$ 0.05              | 0.001 $\pm$ 0.00               | 0.29    |
| Proteobacteria | <i>Bacillus</i>                              | 0.0262 $\pm$ 0.01              | 0.0473 $\pm$ 0.03             | 0.0151 $\pm$ 0.01              | 0.21    |
|                |                                              | 0.164 $\pm$ 0.08               | 0.103 $\pm$ 0.09              | 0.150 $\pm$ 0.06               | 0.63    |
|                | <i>Escherichia</i>                           | 0.101 $\pm$ 0.07 <sup>a</sup>  | 0.000 $\pm$ 0.00 <sup>b</sup> | 0.019 $\pm$ 0.03 <sup>ab</sup> | 0.02    |
| Actinobacteria | <i>Comamonas</i>                             | 0.011 $\pm$ 0.0 <sup>a</sup>   | 0.009 $\pm$ 0.01 <sup>a</sup> | 0.054 $\pm$ 0.03 <sup>b</sup>  | 0.02    |
|                | <i>Olsenella</i>                             | 0.073 $\pm$ 0.04               | 0.119 $\pm$ 0.04              | 0.178 $\pm$ 0.16               | 0.27    |
| Bacteroidetes  |                                              | 0.054 $\pm$ 0.04               | 0.106 $\pm$ 0.04              | 0.153 $\pm$ 0.16               | 0.39    |
|                |                                              | 0.012 $\pm$ 0.01               | 0.109 $\pm$ 0.12              | 0.008 $\pm$ 0.01               | 0.14    |
| Colon          | <i>Alloprevotella</i>                        | 0.003 $\pm$ 0.00               | 0.022 $\pm$ 0.03              | 0.001 $\pm$ 0.00               | 0.29    |
|                | <i>Bacteroides</i>                           | 0.001 $\pm$ 0.00               | 0.009 $\pm$ 0.01              | 0.009 $\pm$ 0.00               | 0.17    |
| Firmicutes     |                                              | 0.584 $\pm$ 0.19               | 0.652 $\pm$ 0.20              | 0.640 $\pm$ 0.16               | 0.82    |
|                | <i>Faecalibacterium</i>                      | 0.184 $\pm$ 0.09               | 0.294 $\pm$ 0.14              | 0.241 $\pm$ 0.14               | 0.59    |
|                | <i>Blautia</i>                               | 0.044 $\pm$ 0.00               | 0.084 $\pm$ 0.04              | 0.070 $\pm$ 0.01               | 0.13    |
|                | <i>Ruminococcus_gauvreauii_</i>              | 0.063 $\pm$ 0.11               | 0.034 $\pm$ 0.03              | 0.005 $\pm$ 0.00               | 0.46    |
|                | <i>Subdoligranulum</i>                       | 0.028 $\pm$ 0.02               | 0.024 $\pm$ 0.01              | 0.040 $\pm$ 0.04               | 0.74    |
| Bacteroidetes  |                                              | 0.348 $\pm$ 0.22               | 0.307 $\pm$ 0.20              | 0.277 $\pm$ 0.14               | 0.84    |
|                | <i>Alloprevotella</i>                        | 0.230 $\pm$ 0.15               | 0.199 $\pm$ 0.17              | 0.004 $\pm$ 0.00               | 0.08    |
|                | <i>Prevotellaceae_Ga6A1_</i><br><i>group</i> | 0.011 $\pm$ 0.02 <sup>a</sup>  | 0.012 $\pm$ 0.01 <sup>a</sup> | 0.074 $\pm$ 0.06 <sup>b</sup>  | 0.02    |
|                | <i>Bacteroides</i>                           | 0.030 $\pm$ 0.03               | 0.037 $\pm$ 0.03              | 0.137 $\pm$ 0.10               | 0.13    |
| Actinobacteria |                                              | 0.041 $\pm$ 0.04               | 0.024 $\pm$ 0.02              | 0.076 $\pm$ 0.05               | 0.29    |
| Proteobacteria |                                              | 0.007 $\pm$ 0.01               | 0.006 $\pm$ 0.01              | 0.004 $\pm$ 0.00               | 0.81    |
| Rectum         | Firmicutes                                   | 0.509 $\pm$ 0.14               | 0.553 $\pm$ 0.15              | 0.557 $\pm$ 0.20               | 0.91    |
|                | <i>Blautia</i>                               | 0.042 $\pm$ 0.01               | 0.100 $\pm$ 0.06              | 0.070 $\pm$ 0.05               | 0.36    |
|                | <i>Faecalibacterium</i>                      | 0.113 $\pm$ 0.09               | 0.223 $\pm$ 0.07              | 0.212 $\pm$ 0.19               | 0.54    |
|                | <i>Eubacterium</i>                           | 0.049 $\pm$ 0.04               | 0.027 $\pm$ 0.00              | 0.049 $\pm$ 0.06               | 0.36    |
|                | <i>Megamonas</i>                             | 0.047 $\pm$ 0.04               | 0.002 $\pm$ 0.00              | 0.050 $\pm$ 0.09               | 0.30    |
|                | <i>phascolarctobacterium</i>                 | 0.036 $\pm$ 0.02 <sup>a</sup>  | 0.004 $\pm$ 0.01 <sup>b</sup> | 0.005 $\pm$ 0.00 <sup>b</sup>  | 0.02    |
|                | Bacteroidetes                                | 0.401 $\pm$ 0.19               | 0.407 $\pm$ 0.16              | 0.399 $\pm$ 0.23               | 1.00    |
|                | <i>Alloprevotella</i>                        | 0.195 $\pm$ 0.09 <sup>ab</sup> | 0.224 $\pm$ 0.17 <sup>a</sup> | 0.010 $\pm$ 0.01 <sup>b</sup>  | 0.03    |
|                | <i>Bacteroides</i>                           | 0.060 $\pm$ 0.03               | 0.077 $\pm$ 0.05              | 0.185 $\pm$ 0.14               | 0.19    |
|                | Actinobacteria                               | 0.055 $\pm$ 0.07               | 0.015 $\pm$ 0.01              | 0.036 $\pm$ 0.04               | 0.59    |
| Proteobacteria | 0.012 $\pm$ 0.01                             | 0.007 $\pm$ 0.01               | 0.004 $\pm$ 0.00              | 0.23                           |         |

Note: The values are the mean plus SD; CON = control, LCA = low cocktail of antibiotics concentration; LSA = low concentration of single antibiotic. Means with different superscript are significantly different ( $P < 0.05$ ).

**Table S3:** Description of the relative abundance of the predominant families of the ileum, colon and rectum samples.

| Ileum-Family         | CON          | LCA          | LSA           | P value |
|----------------------|--------------|--------------|---------------|---------|
| Lachnospiraceae      | 0.2343±0.12  | 0.2717±0.15  | 0.1164±0.06   | 0.32    |
| Peptostreptococaceae | 0.1024±0.08  | 0.0155±0.02  | 0.1775±0.34   | 0.58    |
| Ruminococcaceae      | 0.0480±0.02  | 0.0981±0.10  | 0.0330±0.01   | 0.36    |
| Enterobacteriaceae   | 0.1019±0.07a | 0.0023±0.00b | 0.0204±0.03ab | 0.02    |
| Coriobacteriaceae    | 0.0648±0.04  | 0.1128±0.04  | 0.1589±0.16   | 0.34    |
| Colon                |              |              |               |         |
| Lachnospiraceae      | 0.1982±0.14  | 0.1835±0.07  | 0.1407±0.05   | 0.58    |
| Ruminococcaceae      | 0.2962±0.11  | 0.4357±0.15  | 0.4203±0.14   | 0.37    |
| Prevotellaceae       | 0.2969±0.18  | 0.2495±0.18  | 0.1129±0.05   | 0.10    |
| Bacteroidaceae       | 0.0302±0.03  | 0.0368±0.03  | 0.1370±0.10   | 0.13    |
| Coriobacteriaceae    | 0.0263±0.02  | 0.0223±0.02  | 0.0684±0.05   | 0.26    |
| Rectum               |              |              |               |         |
| Lachnospiraceae      | 0.1189±0.05  | 0.1831±0.09  | 0.1134±0.09   | 0.50    |
| Ruminococcaceae      | 0.2580±0.10  | 0.3395±0.08  | 0.3694±0.14   | 0.43    |
| Prevotellaceae       | 0.2805±0.15  | 0.2977±0.15  | 0.1291±0.07   | 0.11    |
| Bacteroidaceae       | 0.0598±0.03  | 0.0771±0.05  | 0.1847±0.13   | 0.19    |
| Porphyromonadaceae   | 0.0282±0.01  | 0.0158±0.01  | 0.0577±0.10   | 0.32    |

Note: The values are the mean plus SD; CON = control, LCA = low cocktail of antibiotics concentration; LSA = low concentration of single antibiotic. Means with different superscript are significantly different ( $P < 0.05$ ).

(A)

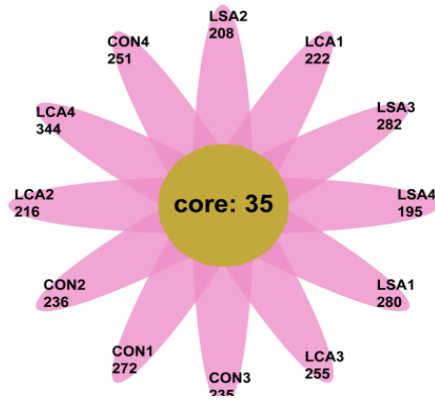

(B)

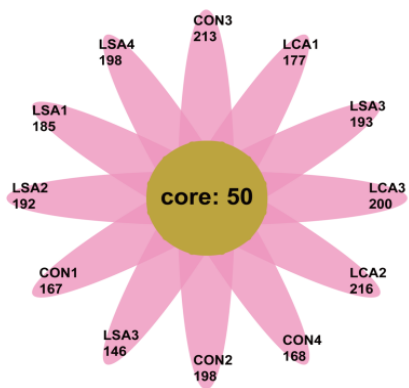

(C)

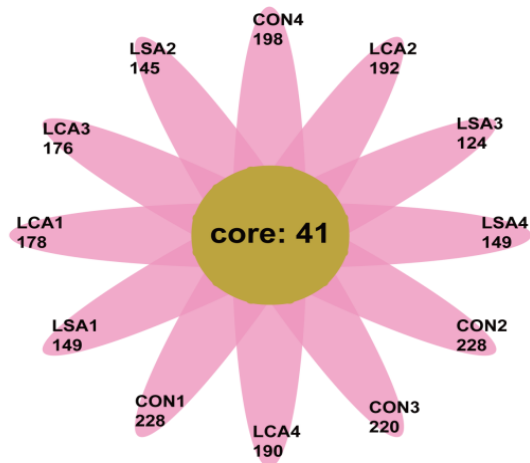

**Figure (S1):** The yellow circle represents the shared OTUs among animals in each treatments and the pink color represents number of OTUs in each individual. A= Ileum; B= colon and C= Rectum. CON= control; LCA= low cocktail of antibiotics concentration; LSA= low concentration of single antibiotic

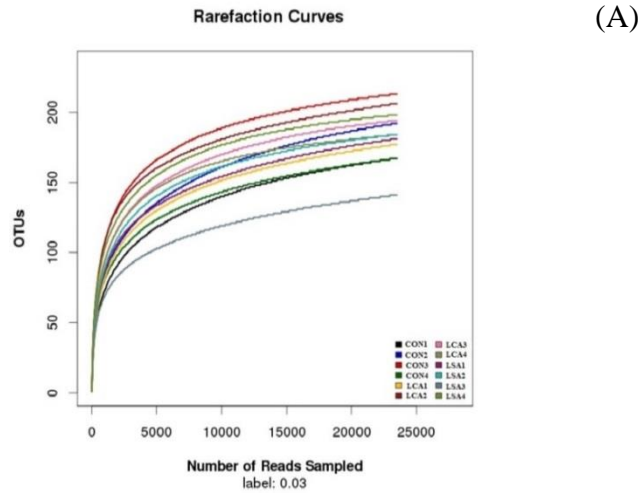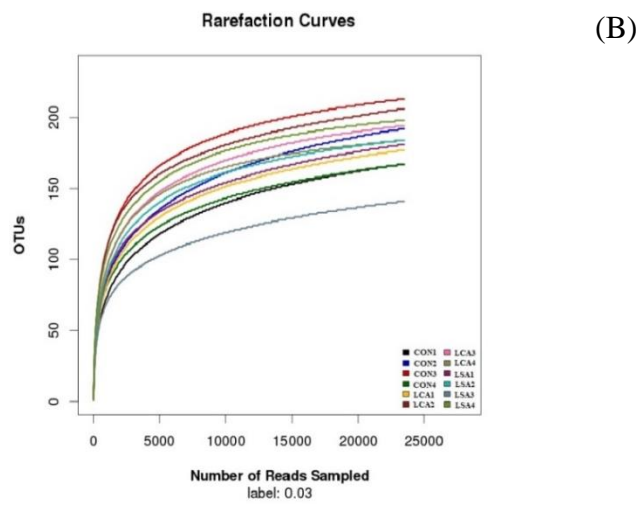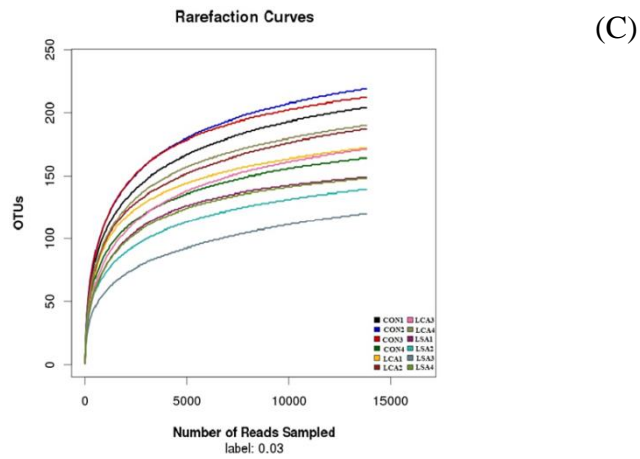

**Figure (S2):** Rarefaction curves of the microbial communities of ileum, colon and rectum samples where each curve represents one animal. A= Ileum; B= colon and C= Rectum. CON= control; LCA= low cocktail of antibiotics concentration; LSA= low concentration of single antibiotic. Each curve represents one individual sample.
